# Supplementary material
Source: PubMed Central journal article supplement (PMC379261)

Figure S2

A. Lac-GFP Binds Multiple operators

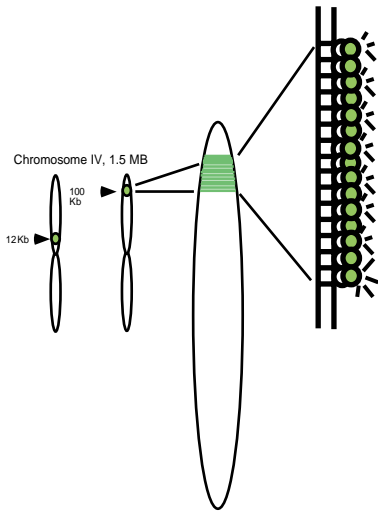

B. All Template Mutants Bud Normally

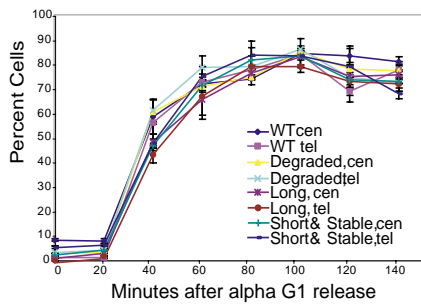

C. *tlc1* Mutants Can Duplicate DNA; no S-Phase arrest.

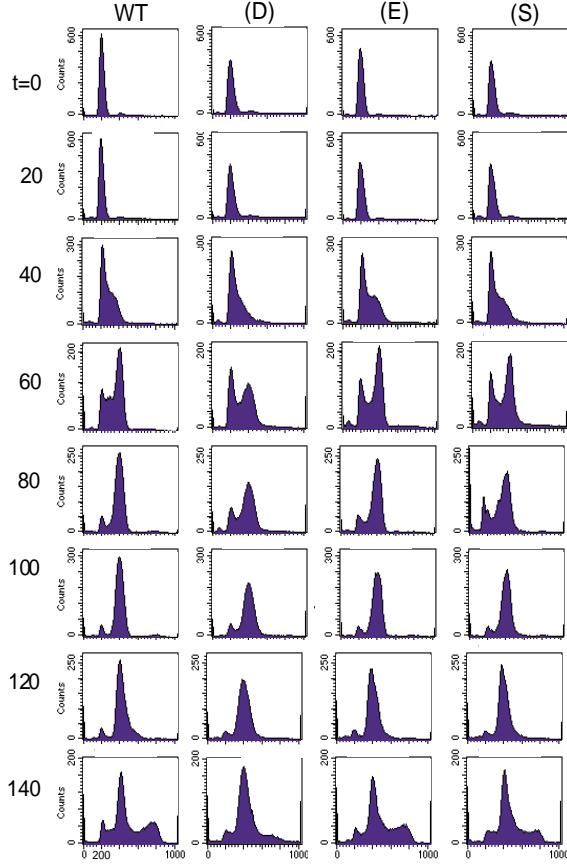

Supplement: mbc_15_4_1623__4.pdf [file mbc_15_4_1623__4.pdf]
