# Supplementary material
Source: PubMed Central journal article supplement (PMC379261)

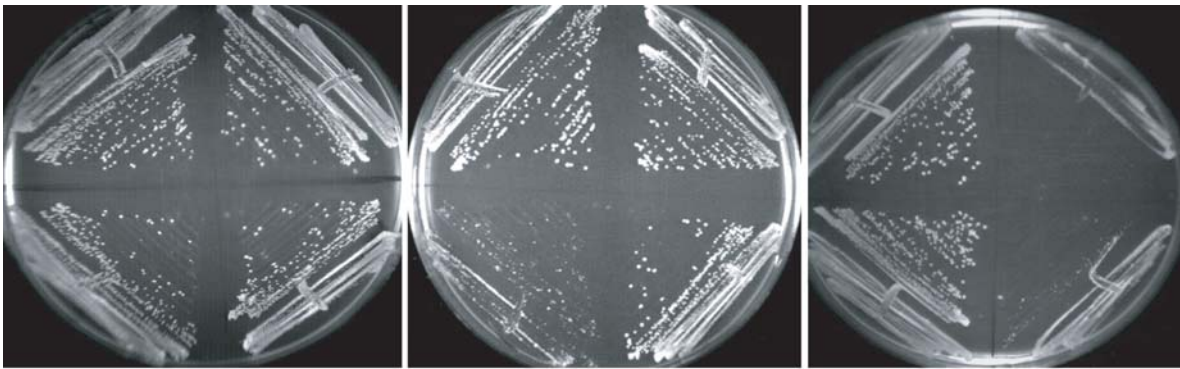

A. coexpressed with wild type TLC1

B. streak 1

C. streak 1

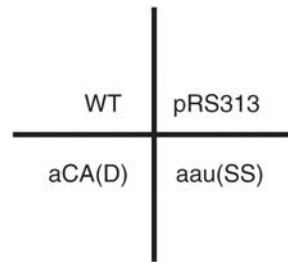

Supplement: mbc_15_4_1623__1.pdf [file mbc_15_4_1623__1.pdf]
